# Supplementary material for: Autophagy subtypes characterization identifies immune phenotypes and immunotherapy response in head and neck squamous cell carcinoma (HNSCC)
Source: Research Square preprint supplement (doi:10.21203/rs.3.rs-1453310/v1), 2022-04-20
Supplement: Supplementary file 1 [file 6fd3dbf751ded3f083d150b5.csv]

	ATGscore	Angiogenesis	Antigen_processing_machinery	Base_excision_repair	CD8_T_effector	Cell_cycle	Cell_cycle_regulators	DNA_damage_repair1	DNA_damage_repair2	DNA_replication	EMT1	EMT2	EMT3	Fanconi_anemia	Homologous_recombination	Immune_checkpoint	Mismatch_repair	Nucleotide_excision_repair	Pan-F-TBRS	WNT_target
ATGscore	1	-0.0919440644132862	-0.0623026399735856	-0.156680847691606	-0.429970112779492	-0.208102946325071	-0.293413857138386	-0.122382737455309	-0.271531837261157	-0.204410471834965	-0.300597547589429	0.222065748462514	0.0663278245144362	-0.226299612917515	-0.0517276707670546	-0.366717907756918	-0.190763817674234	0.00832904589726828	0.245784509385475	0.323708626095715
Angiogenesis	-0.0919440644132862	1	0.0533676767730488	-0.387799476992881	0.140779858568728	-0.209002966146383	0.00216782756327595	-0.403411071346015	-0.257633501225755	-0.297361799211489	0.269736829530588	0.520878177850799	0.555089038746483	-0.273557086951126	-0.337303432386634	0.20223376340793	-0.313185862888785	-0.429352646488744	0.558500664283625	0.0781648300822108
Antigen_processing_machinery	-0.0623026399735856	0.0533676767730488	1	-0.022703741580179	0.617994612497011	0.0169823253203043	0.106380509691079	-0.0113344668366622	-0.00956840212834152	-0.030428441052471	-0.259633466375958	0.0232508514942928	0.0832382351433557	0.030326724382935	-0.0043693446925081	0.584132572377893	-0.0544522835164884	0.047817910620853	-0.00595195680205313	-0.161754945751334
Base_excision_repair	-0.156680847691606	-0.387799476992881	-0.022703741580179	1	0.0677435494578142	0.622966977596523	0.0487743366479884	0.810068068724216	0.708071608291881	0.86835392907721	-0.141089494754477	-0.491736582475887	-0.417150132898856	0.648559856948654	0.784860493124812	-0.0130993501452228	0.810096881272032	0.802475200326478	-0.478265672944581	-0.30379048149512
CD8_T_effector	-0.429970112779492	0.140779858568728	0.617994612497011	0.0677435494578142	1	0.0805760100126792	0.19919523369765	0.00554085094109756	0.0766612977856929	0.0777445834598249	0.0114236302949775	0.021941662614304	0.18875432793743	0.0912260011785526	0.00137725811336191	0.91216764170206	0.0468190807560642	0.0248910550647393	-0.0342945191719896	-0.284960508407825
Cell_cycle	-0.208102946325071	-0.209002966146383	0.0169823253203043	0.622966977596523	0.0805760100126792	1	0.437116748880559	0.843457699376989	0.905152207940525	0.836261937145745	-0.0099245879227809	-0.232925110308502	-0.175190624746123	0.886104076581536	0.806820089471368	0.0266732867924738	0.857295908325992	0.69473588387727	-0.245927391067572	-0.0643077522329612
Cell_cycle_regulators	-0.293413857138386	0.00216782756327595	0.106380509691079	0.0487743366479884	0.19919523369765	0.437116748880559	1	0.237556567725181	0.330841101438021	0.155342268958451	0.0976375677358473	-0.0530800328213354	-0.00464948417590639	0.310613709084918	0.133857112897664	0.171751825259975	0.19855608337232	0.145740237284704	-0.0568118711684338	-0.076976815667546
DNA_damage_repair1	-0.122382737455309	-0.403411071346015	-0.0113344668366622	0.810068068724216	0.00554085094109756	0.843457699376989	0.237556567725181	1	0.914769280385256	0.881091490792781	-0.213487315676263	-0.436833871870381	-0.391527916689267	0.917603895992748	0.905791065548999	-0.0652137206569224	0.922946496532583	0.87930287370251	-0.44381858853203	-0.128029986427228
DNA_damage_repair2	-0.271531837261157	-0.257633501225755	-0.00956840212834152	0.708071608291881	0.0766612977856929	0.905152207940525	0.330841101438021	0.914769280385256	1	0.871577823730497	-0.0618564902623436	-0.328011181052502	-0.260593930486275	0.956359833352928	0.866684086561048	0.0196951228889235	0.908059565824561	0.72230685851771	-0.355869220123826	-0.0886638987981088
DNA_replication	-0.204410471834965	-0.297361799211489	-0.030428441052471	0.86835392907721	0.0777445834598249	0.836261937145745	0.155342268958451	0.881091490792781	0.871577823730497	1	-0.0996728286552511	-0.374585669178748	-0.30538211604362	0.828049585517523	0.902364648052263	0.0196372356539904	0.951757669631227	0.84995850259594	-0.361931914287932	-0.260585718961063
EMT1	-0.300597547589429	0.269736829530588	-0.259633466375958	-0.141089494754477	0.0114236302949775	-0.0099245879227809	0.0976375677358473	-0.213487315676263	-0.0618564902623436	-0.0996728286552511	1	0.213735607190389	0.347488654787816	-0.143628230235316	-0.246249425646633	0.0196690264270595	-0.0929625211542783	-0.323174767193728	0.225858106740797	0.120397454017383
EMT2	0.222065748462514	0.520878177850799	0.0232508514942928	-0.491736582475887	0.021941662614304	-0.232925110308502	-0.0530800328213354	-0.436833871870381	-0.328011181052502	-0.374585669178748	0.213735607190389	1	0.797100347192257	-0.332797320481184	-0.35875166296907	0.174097226497523	-0.37061928840259	-0.43145644816821	0.892378751199313	0.478238875332406
EMT3	0.0663278245144362	0.555089038746483	0.0832382351433557	-0.417150132898856	0.18875432793743	-0.175190624746123	-0.00464948417590639	-0.391527916689267	-0.260593930486275	-0.30538211604362	0.347488654787816	0.797100347192257	1	-0.268626542911283	-0.322205266820627	0.314475908659745	-0.297018737093271	-0.403793570448305	0.79499819848783	0.338482682913996
Fanconi_anemia	-0.226299612917515	-0.273557086951126	0.030326724382935	0.648559856948654	0.0912260011785526	0.886104076581536	0.310613709084918	0.917603895992748	0.956359833352928	0.828049585517523	-0.143628230235316	-0.332797320481184	-0.268626542911283	1	0.875161118333362	0.0398694695442965	0.888660844186176	0.743221673500035	-0.365578776018084	-0.0920127965565939
Homologous_recombination	-0.0517276707670546	-0.337303432386634	-0.0043693446925081	0.784860493124812	0.00137725811336191	0.806820089471368	0.133857112897664	0.905791065548999	0.866684086561048	0.902364648052263	-0.246249425646633	-0.35875166296907	-0.322205266820627	0.875161118333362	1	-0.030453533029934	0.914292986284685	0.845078502671876	-0.353838843544024	-0.13668337627091
Immune_checkpoint	-0.366717907756918	0.20223376340793	0.584132572377893	-0.0130993501452228	0.91216764170206	0.0266732867924738	0.171751825259975	-0.0652137206569224	0.0196951228889235	0.0196372356539904	0.0196690264270595	0.174097226497523	0.314475908659745	0.0398694695442965	-0.030453533029934	1	-0.0126359932144558	-0.0307283252413906	0.134999329931759	-0.222751511725926
Mismatch_repair	-0.190763817674234	-0.313185862888785	-0.0544522835164884	0.810096881272032	0.0468190807560642	0.857295908325992	0.19855608337232	0.922946496532583	0.908059565824561	0.951757669631227	-0.0929625211542783	-0.37061928840259	-0.297018737093271	0.888660844186176	0.914292986284685	-0.0126359932144558	1	0.843818769899658	-0.371211322205237	-0.164053745970873
Nucleotide_excision_repair	0.00832904589726828	-0.429352646488744	0.047817910620853	0.802475200326478	0.0248910550647393	0.69473588387727	0.145740237284704	0.87930287370251	0.72230685851771	0.84995850259594	-0.323174767193728	-0.43145644816821	-0.403793570448305	0.743221673500035	0.845078502671876	-0.0307283252413906	0.843818769899658	1	-0.407006986725198	-0.263927005864839
Pan-F-TBRS	0.245784509385475	0.558500664283625	-0.00595195680205313	-0.478265672944581	-0.0342945191719896	-0.245927391067572	-0.0568118711684338	-0.44381858853203	-0.355869220123826	-0.361931914287932	0.225858106740797	0.892378751199313	0.79499819848783	-0.365578776018084	-0.353838843544024	0.134999329931759	-0.371211322205237	-0.407006986725198	1	0.414224682059501
WNT_target	0.323708626095715	0.0781648300822108	-0.161754945751334	-0.30379048149512	-0.284960508407825	-0.0643077522329612	-0.076976815667546	-0.128029986427228	-0.0886638987981088	-0.260585718961063	0.120397454017383	0.478238875332406	0.338482682913996	-0.0920127965565939	-0.13668337627091	-0.222751511725926	-0.164053745970873	-0.263927005864839	0.414224682059501	1
