# Supplementary material for: Autophagy subtypes characterization identifies immune phenotypes and immunotherapy response in head and neck squamous cell carcinoma (HNSCC)
Source: Research Square preprint supplement (doi:10.21203/rs.3.rs-1453310/v1), 2022-04-20
Supplement: Supplementary file 2 [file 82cbd15c674e1b32bb51da90.csv]

	ATGscore	Angiogenesis	Antigen processing machinery	Base_excision_repair	CD8 T effector	Cell cycle	Cell cycle regulators	DNA damage repair1	DNA damage repair2	DNA replication	EMT1	EMT2	EMT3	Fanconi anemia	Homologous recombination	Immune checkpoint	Mismatch repair	Nucleotide excision repair	Pan-F-TBRS	WNT target
ATGscore	1	0.261062169628454	-0.227524773765935	0.00529671751584929	-0.341369544657471	0.0354921078544676	-0.0577432714842904	0.053826464828954	0.0631075764247783	0.0196082155793282	0.0166718822843663	0.18424371918908	0.151211793162584	0.0459319957525924	0.0183565308296517	-0.35515973607997	0.0630835388267074	0.0495324490307972	0.215829962846415	0.24350214971069
Angiogenesis	0.261062169628454	1	-0.160382701942382	-0.330788305876044	-0.0469259167131839	-0.38003145348231	-0.293269144511617	-0.410080583421649	-0.369461926504476	-0.35919755638715	0.198335269724852	0.286302222623656	0.342658983151348	-0.370044322353853	-0.338801729111106	-0.0378219862351563	-0.320771876442412	-0.368118430949884	0.307014429539284	-0.118740908871095
Antigen processing machinery	-0.227524773765935	-0.160382701942382	1	-0.0174889507204954	0.718767742350917	0.145977796761765	0.1622193472414	-0.0246964718733588	0.04276099938552	0.106995568271849	-0.131808497471155	0.0139529466907386	-0.107681416104057	0.0694505102313349	0.0665833263763904	0.62980966320266	0.0459021655923169	0.0665629472967955	-0.130719370981015	-0.0649230721279244
Base_excision_repair	0.00529671751584929	-0.330788305876044	-0.0174889507204954	1	-0.077094252146301	0.610389527686501	0.0683645403668471	0.789405684296533	0.703562157467021	0.858796092746664	-0.463022921073353	-0.333280700164574	-0.424173193625663	0.634285661172043	0.831291046429851	-0.0580080577321538	0.786561315715833	0.793621708389444	-0.22785986535397	0.0269304667428968
CD8 T effector	-0.341369544657471	-0.0469259167131839	0.718767742350917	-0.077094252146301	1	-0.0114462861715558	0.0638611982304754	-0.131716852548239	-0.0351344661651853	0.00998231662941252	-0.0300498951464002	0.0107815097851435	-0.00893294475335979	-0.0593220666063494	-0.0456432342843342	0.774554601216743	-0.0442604937889468	-0.0848049099064073	-0.118984658506037	-0.257801138475912
Cell cycle	0.0354921078544676	-0.38003145348231	0.145977796761765	0.610389527686501	-0.0114462861715558	1	0.497278871788797	0.817258527776435	0.847931647959387	0.853884205772489	-0.351822831651223	-0.107046657046922	-0.114304451018518	0.846954616869719	0.770249334220043	0.00641154193302977	0.830665901879045	0.743834407142685	-0.181806884667463	0.419142643738829
Cell cycle regulators	-0.0577432714842904	-0.293269144511617	0.1622193472414	0.0683645403668471	0.0638611982304754	0.497278871788797	1	0.276277782556448	0.317477045299897	0.270177949972246	-0.168179419716989	-0.0520019166507545	-0.0268260660752047	0.30591262611827	0.228242230122076	0.10700581720927	0.279484858990468	0.303548970149818	-0.180792143092864	0.247282315531032
DNA damage repair1	0.053826464828954	-0.410080583421649	-0.0246964718733588	0.789405684296533	-0.131716852548239	0.817258527776435	0.276277782556448	1	0.943584543505204	0.855491025020728	-0.460202333167627	-0.308767742373455	-0.29350611927284	0.904663210609242	0.86132169138352	-0.135995214233503	0.889460897359556	0.855084320648097	-0.281272373956847	0.326679040344941
DNA damage repair2	0.0631075764247783	-0.369461926504476	0.04276099938552	0.703562157467021	-0.0351344661651853	0.847931647959387	0.317477045299897	0.943584543505204	1	0.837597730235553	-0.358547260804624	-0.246791075172442	-0.196263201726234	0.931110789346657	0.821146514384865	-0.0506450076547543	0.881524758867567	0.759811063930481	-0.251669788739111	0.34921786836624
DNA replication	0.0196082155793282	-0.35919755638715	0.106995568271849	0.858796092746664	0.00998231662941252	0.853884205772489	0.270177949972246	0.855491025020728	0.837597730235553	1	-0.431839399556921	-0.204014031031896	-0.263725816381884	0.816424200005139	0.895416191980613	0.028062060534221	0.93746683356951	0.871334315436769	-0.203588262818667	0.187696525475956
EMT1	0.0166718822843663	0.198335269724852	-0.131808497471155	-0.463022921073353	-0.0300498951464002	-0.351822831651223	-0.168179419716989	-0.460202333167627	-0.358547260804624	-0.431839399556921	1	0.412910505388345	0.562586727972521	-0.377154867578506	-0.481110067393694	-0.00466385942544971	-0.395815846516874	-0.534514671735725	0.366751236757415	-0.0481183729180824
EMT2	0.18424371918908	0.286302222623656	0.0139529466907386	-0.333280700164574	0.0107815097851435	-0.107046657046922	-0.0520019166507545	-0.308767742373455	-0.246791075172442	-0.204014031031896	0.412910505388345	1	0.726960005088258	-0.267072586431433	-0.277136705970569	0.106942851187665	-0.203194960899669	-0.295935248978032	0.781994790132245	0.111534284377246
EMT3	0.151211793162584	0.342658983151348	-0.107681416104057	-0.424173193625663	-0.00893294475335979	-0.114304451018518	-0.0268260660752047	-0.29350611927284	-0.196263201726234	-0.263725816381884	0.562586727972521	0.726960005088258	1	-0.196626599135735	-0.315636422269937	0.0657656955002236	-0.215851324298375	-0.382263986911273	0.675272758705582	0.176184092267509
Fanconi anemia	0.0459319957525924	-0.370044322353853	0.0694505102313349	0.634285661172043	-0.0593220666063494	0.846954616869719	0.30591262611827	0.904663210609242	0.931110789346657	0.816424200005139	-0.377154867578506	-0.267072586431433	-0.196626599135735	1	0.830939443615669	-0.039937344970152	0.861205705001268	0.778117345659761	-0.266698704925448	0.368030079111687
Homologous recombination	0.0183565308296517	-0.338801729111106	0.0665833263763904	0.831291046429851	-0.0456432342843342	0.770249334220043	0.228242230122076	0.86132169138352	0.821146514384865	0.895416191980613	-0.481110067393694	-0.277136705970569	-0.315636422269937	0.830939443615669	1	-0.012093097747009	0.872924376583717	0.836685048373252	-0.232350147088725	0.174920952309724
Immune checkpoint	-0.35515973607997	-0.0378219862351563	0.62980966320266	-0.0580080577321538	0.774554601216743	0.00641154193302977	0.10700581720927	-0.135995214233503	-0.0506450076547543	0.028062060534221	-0.00466385942544971	0.106942851187665	0.0657656955002236	-0.039937344970152	-0.012093097747009	1	-0.0245279951518514	-0.0792191702557274	-0.00253821565905593	-0.224241919414831
Mismatch repair	0.0630835388267074	-0.320771876442412	0.0459021655923169	0.786561315715833	-0.0442604937889468	0.830665901879045	0.279484858990468	0.889460897359556	0.881524758867567	0.93746683356951	-0.395815846516874	-0.203194960899669	-0.215851324298375	0.861205705001268	0.872924376583717	-0.0245279951518514	1	0.866430730973696	-0.185117212527632	0.233122364373606
Nucleotide excision repair	0.0495324490307972	-0.368118430949884	0.0665629472967955	0.793621708389444	-0.0848049099064073	0.743834407142685	0.303548970149818	0.855084320648097	0.759811063930481	0.871334315436769	-0.534514671735725	-0.295935248978032	-0.382263986911273	0.778117345659761	0.836685048373252	-0.0792191702557274	0.866430730973696	1	-0.285410232576348	0.198601622432512
Pan-F-TBRS	0.215829962846415	0.307014429539284	-0.130719370981015	-0.22785986535397	-0.118984658506037	-0.181806884667463	-0.180792143092864	-0.281272373956847	-0.251669788739111	-0.203588262818667	0.366751236757415	0.781994790132245	0.675272758705582	-0.266698704925448	-0.232350147088725	-0.00253821565905593	-0.185117212527632	-0.285410232576348	1	0.0652456038388385
WNT target	0.24350214971069	-0.118740908871095	-0.0649230721279244	0.0269304667428968	-0.257801138475912	0.419142643738829	0.247282315531032	0.326679040344941	0.34921786836624	0.187696525475956	-0.0481183729180824	0.111534284377246	0.176184092267509	0.368030079111687	0.174920952309724	-0.224241919414831	0.233122364373606	0.198601622432512	0.0652456038388385	1
